# Supplementary material for: Facilitating rapid ion transport and boosting redox kinetics in Yb/NiCo-LDH for enhanced supercapacitor performance
Source: Royal Society of Chemistry journal article supplement (doi:10.1039/d5tc04078g), 2026-01-01
Supplement: d5tc04078g1.pdf [file d5tc04078g1.pdf]

## **Facilitating rapid ion transport and boosting redox kinetics in Yb/NiCo-LDH composite for enhanced supercapacitor performance**

Shakeel Ahmad<sup>a</sup>, Muhammad Tariq<sup>a</sup>, Longyang Liu<sup>a</sup>, Henmei Ni<sup>a,\*</sup>, Muhammad Wajid Ullah<sup>b</sup>, Afaq Ullah Khan<sup>c,\*</sup>, Sameerah I. Al-Saeedi<sup>d</sup>, Zainab M. Almarhoon<sup>e</sup>, Magdi E. A. Zaki<sup>f</sup>, Hassan M. A. Hassan<sup>g</sup>

<sup>a</sup>School of Chemistry and Chemical Engineering, Southeast University, Nanjing 211189, PR China

<sup>b</sup>Department of Pulp & Paper Engineering, College of Light Industry and Food Engineering, Nanjing Forestry University, Nanjing 210037, China

<sup>c</sup>School of Chemistry and Chemical Engineering, Jiangsu University, 301 Xuefu Road Zhenjiang 212013, China

<sup>d</sup>Department of Chemistry, College of Science, Princess Nourah bint Abdulrahman University, P.O. Box 84428, Riyadh 11671, Saudi Arabia

<sup>e</sup>Department of Chemistry, College of Science, King Saud University, P. O. Box 2455, Riyadh-11451, Saudi Arabia

<sup>f</sup>Department of Chemistry, Faculty of Science, Imam Mohammad Ibn Saud Islamic University, Riyadh, 13318, Saudi Arabia

<sup>g</sup>Department of Chemistry, College of Science, Jouf University, Sakaka-2014, Saudi Arabia

Corresponding author email addresses: henmei\_ni@seu.edu.cn (H. Ni), [afaqchemist@gmail.com](mailto:afaqchemist@gmail.com) (A. U. Khan)

### **1. Experimental**

#### **1.1 Material characterizations**

The X-ray diffraction (XRD) patterns of the sample materials were obtained using a D/MAX-2500 X-ray diffractometer with Cu K $\alpha$  radiation ( $\lambda = 1.54056 \text{ \AA}$ ), scanning in the range of  $10^\circ$  to  $80^\circ$ . The surface morphology and detailed structural features of the samples were investigated using field-emission scanning electron microscopy (FESEM, S-4800), transmission electron microscopy (TEM), and high-resolution transmission electron microscopy (HRTEM). To analyze the valence states and elemental composition of the electrode materials, X-ray photoelectron spectroscopy (XPS) was performed using an ESCALAB 250X system (USA). The specific surface area of Yb/NiCoLDH nanocomposites was measured using the BET (Brunauer-Emmett-Teller) method, which involved nitrogen adsorption and desorption measurements with a Micromeritics ASAP 2460 instrument. The pore size distribution and pore diameter were determined using the Barrett-Joyner-Halenda (BJH) method.

## 2. Result and discussion

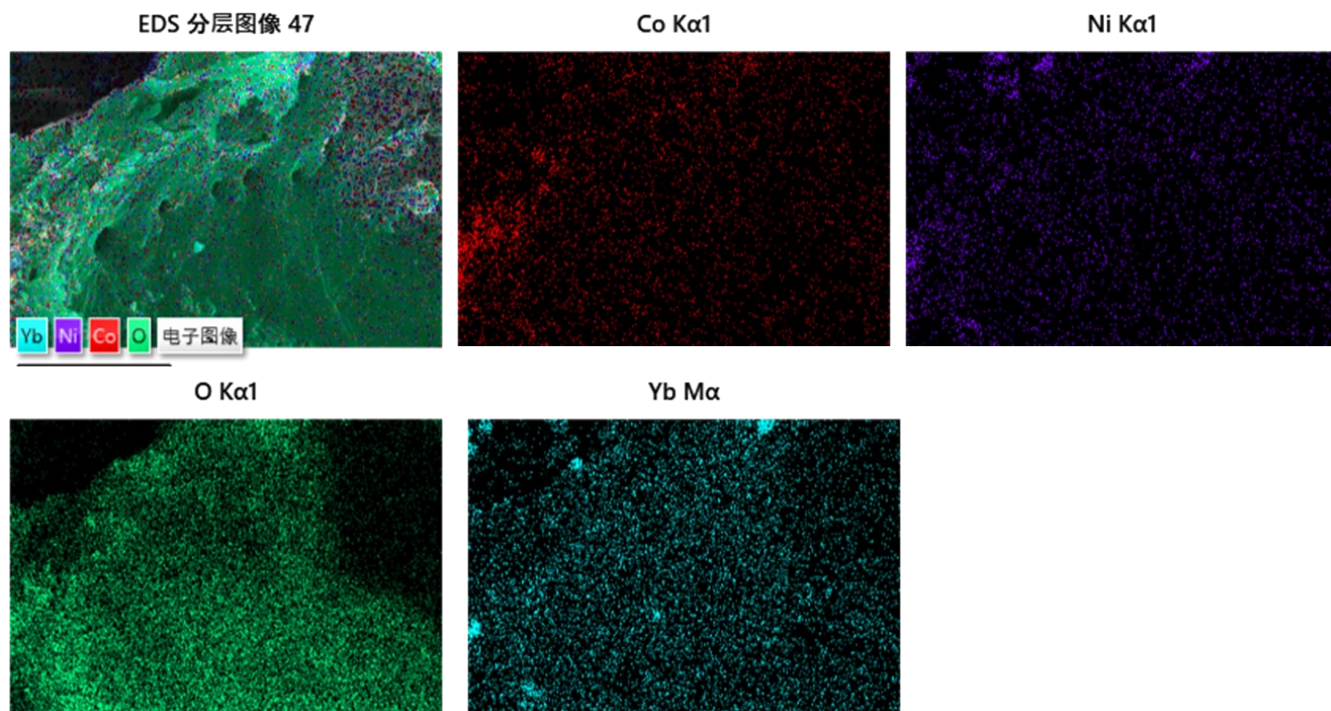

**Fig. S1.** Show the EDS elemental mapping of Yb2.

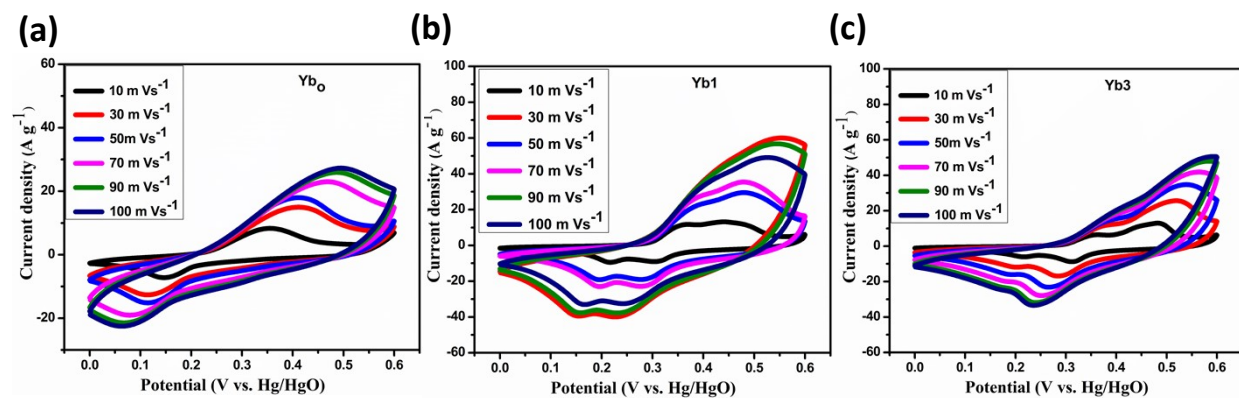

**Fig. S2.** Presents the CV curves of (a-c) Yb<sub>0</sub>, Yb1 and Yb3, respectively.

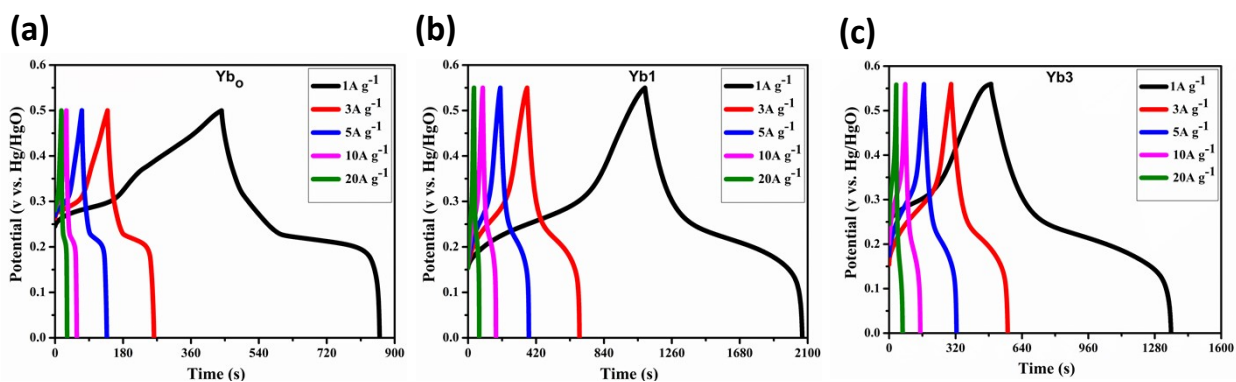

**Fig. S3.** Show GCD curves of (a-c) Yb<sub>0</sub>, Yb1 and Yb3, respectively.
